# Supplementary material for: A dual-mode colorimetric sensor based on copper nanoparticles for the detection of mercury-(ii) ions
Source: Royal Society of Chemistry journal article supplement (doi:10.1039/c9ay00843h), 2019-01-01
Supplement: c9ay00843h1.pdf [file c9ay00843h1.pdf]

## Supporting Information

### **A dual-mode colorimetric sensor based on copper nanoparticles for the detection of mercury-(II) ions**

Qiang Li,<sup>a,b</sup> Feng Wu,<sup>b</sup> Mao Mao,<sup>b,c</sup> Xiang Ji,<sup>b,c</sup> Luyao Wei,<sup>d</sup> Jieying Li,<sup>a,b</sup> and Lan Ma<sup>b,d\*</sup>

<sup>a</sup>*Department of Chemistry, Tsinghua University, Beijing 100084, P. R. China*

<sup>b</sup>*State Key Laboratory of Chemical Oncogenomics, Division of Life Science and Health, The Graduate School at Shenzhen, Tsinghua University, Shenzhen 518055, P. R. China*

<sup>c</sup>*School of Life Science, Tsinghua University, Beijing 100084, P. R. China*

<sup>d</sup>*Tsinghua-Berkeley Shenzhen Institute, Tsinghua University, Beijing, 100084, P.R. China.*

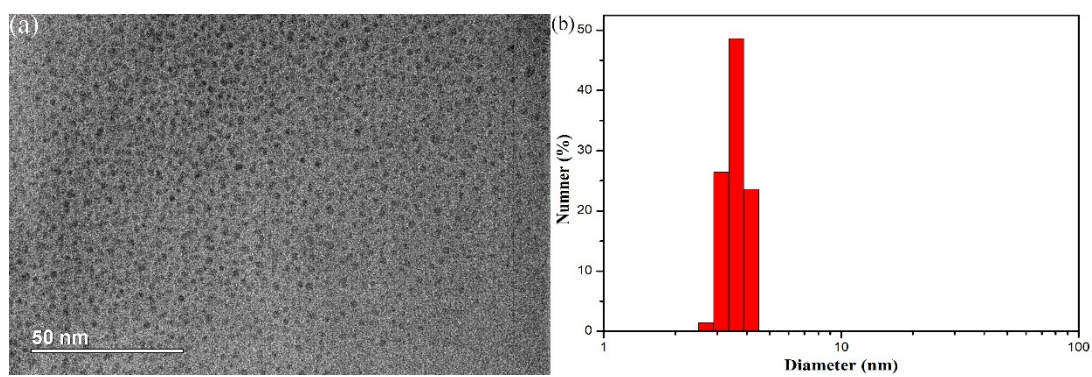

**Figure S1.** (a) TEM image and (b) DLS data of the citrate-capped Cu NPs. (citrate-capped Cu NPs dispersed in water)

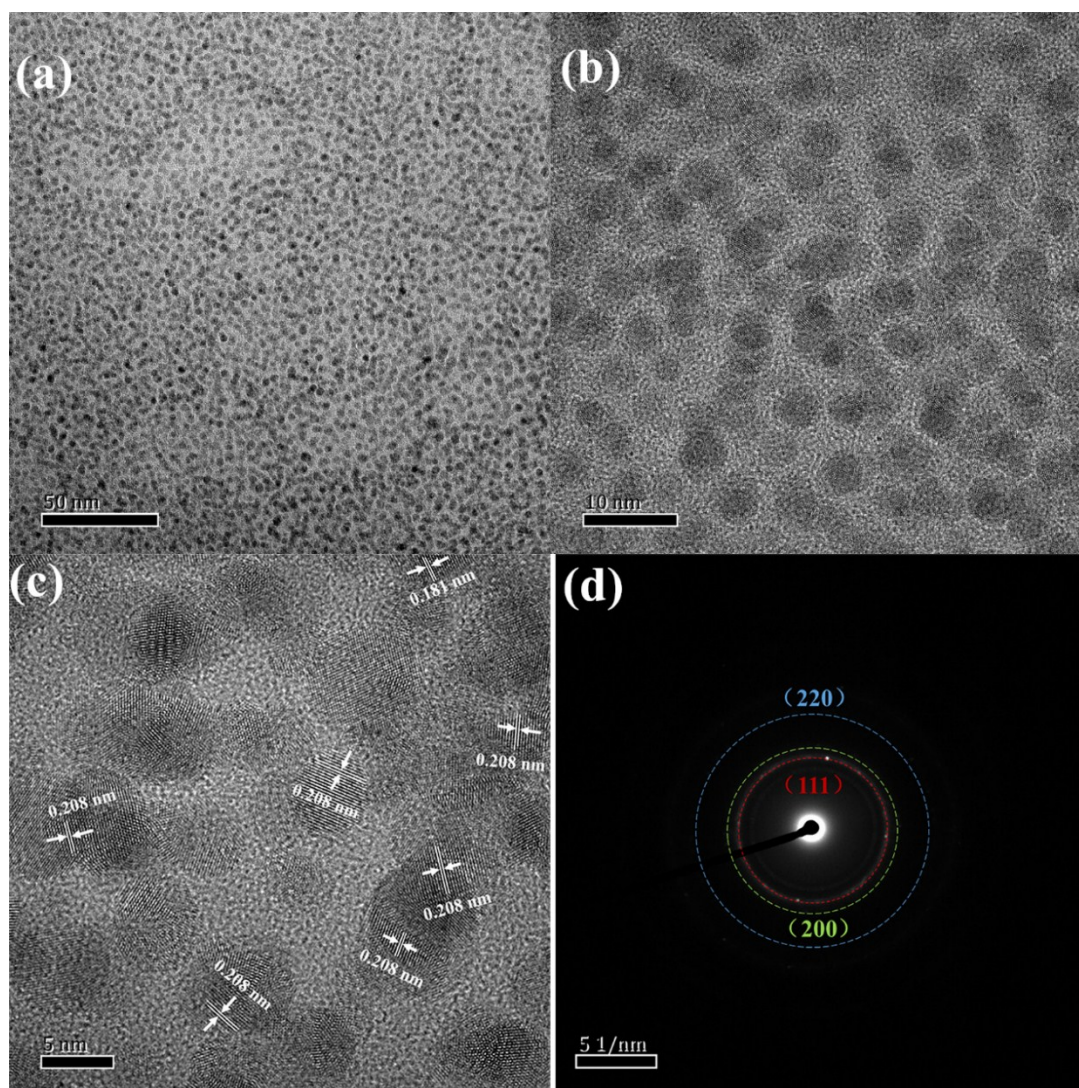

**Figure S2.** (a)~(c) TEM image and (d) SAED image of citrate-capped Cu NPs. (citrate-capped Cu NPs dispersed in ethanol)

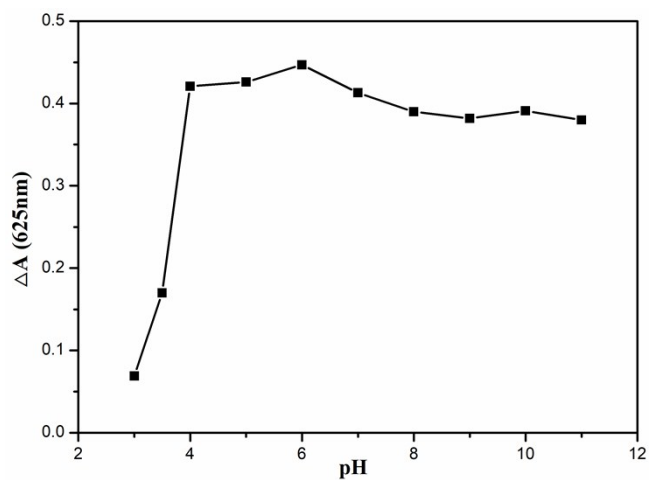

**Figure S3.** Effect of pH on  $\Delta A$ . Reaction conditions: TMB, 0.743 mM;  $H_2O_2$ , 0.177 M; citrate-capped Cu NPs, 100  $\mu$ l; incubation temperature, 25  $^{\circ}C$ ; incubation time, 10 min;  $Hg^{2+}$  (10  $\mu$ M), 500  $\mu$ l; NaAc buffer, 2 ml.

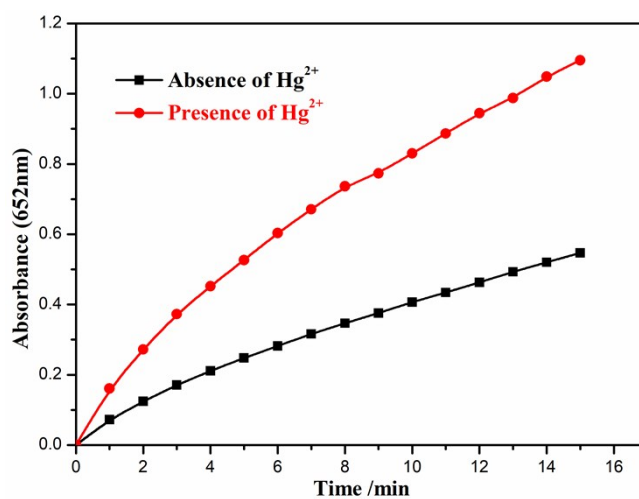

**Figure S4.** Effect of the incubation time on  $A_{652}$ . Reaction conditions: TMB, 0.743 mM;  $H_2O_2$ , 0.177 M; citrate-capped Cu NPs, 100  $\mu$ l; incubation temperature, 25  $^{\circ}C$ ; pH, 4.0;  $Hg^{2+}$  (10  $\mu$ M), 500  $\mu$ l; NaAc buffer, 2 ml.

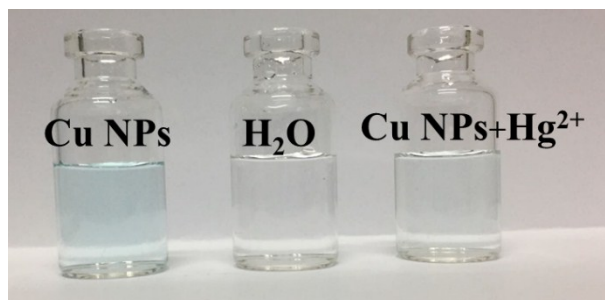

**Figure S5.** The photographs of citrate-capped Cu NPs before and after treatment with  $Hg^{2+}$

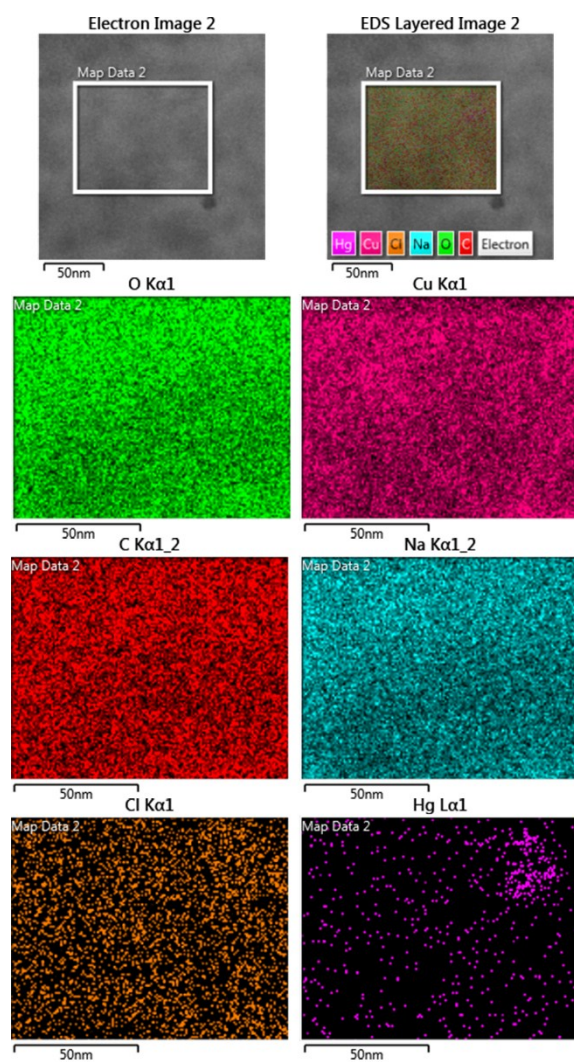

**Figure S6.** A series of TEM X-ray maps from citrate-capped Cu NPs after addition of  $\text{Hg}^{2+}$ .

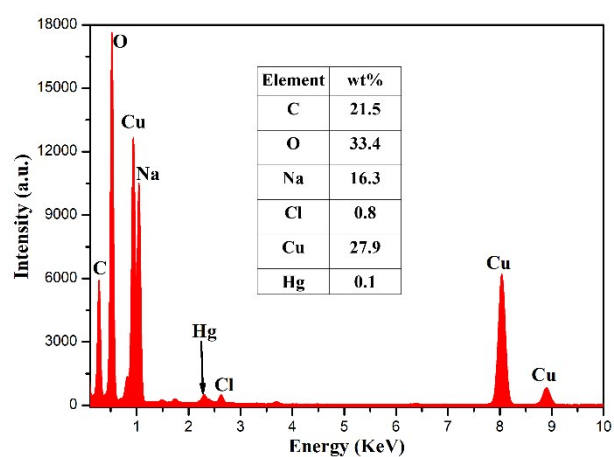

**Figure S7.** A series of TEM X-ray maps from citrate-capped Cu NPs after addition of  $\text{Hg}^{2+}$ .



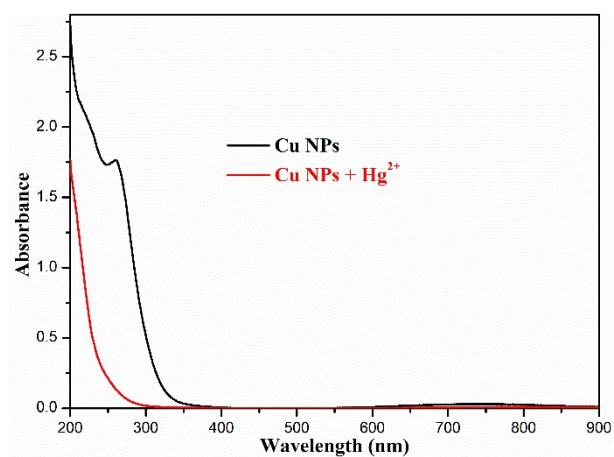

Figure S8. UV-Vis absorption spectra of citrate-capped Cu NPs with and without Hg<sup>2+</sup>

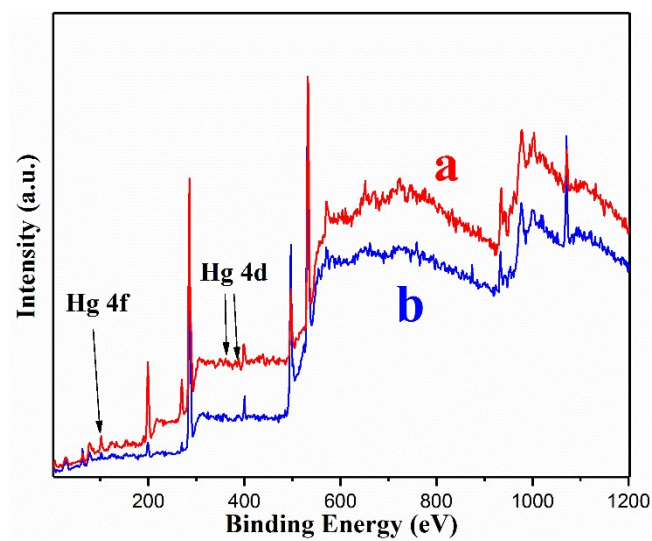

Figure S9. XPS spectra of citrate-capped Cu NPs (a) before and (b) after treatment with Hg<sup>2+</sup>

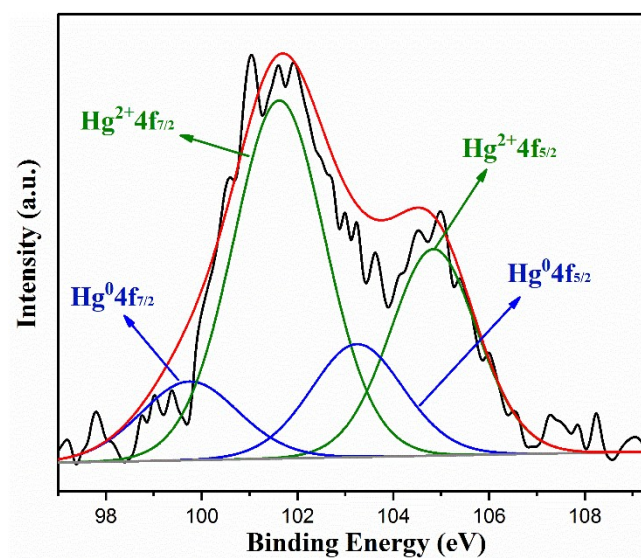

Figure S10. Hg 4f XPS spectrum of the citrate-capped Cu NPs after treatment with Hg<sup>2+</sup>

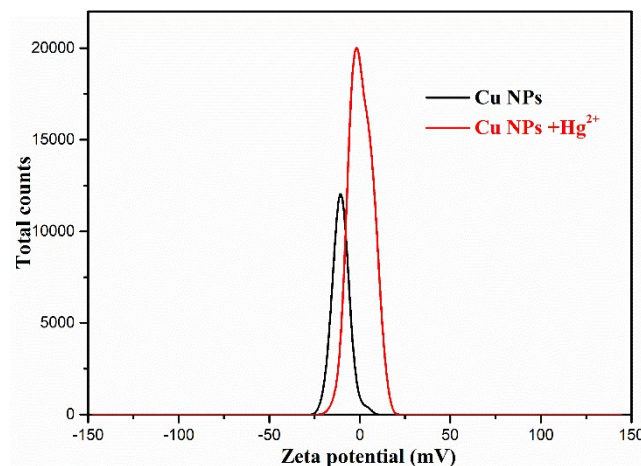

**Figure S11.** The apparent zeta potential curves of the citrate-capped Cu NPs in the absence and presence of  $\text{Hg}^{2+}$

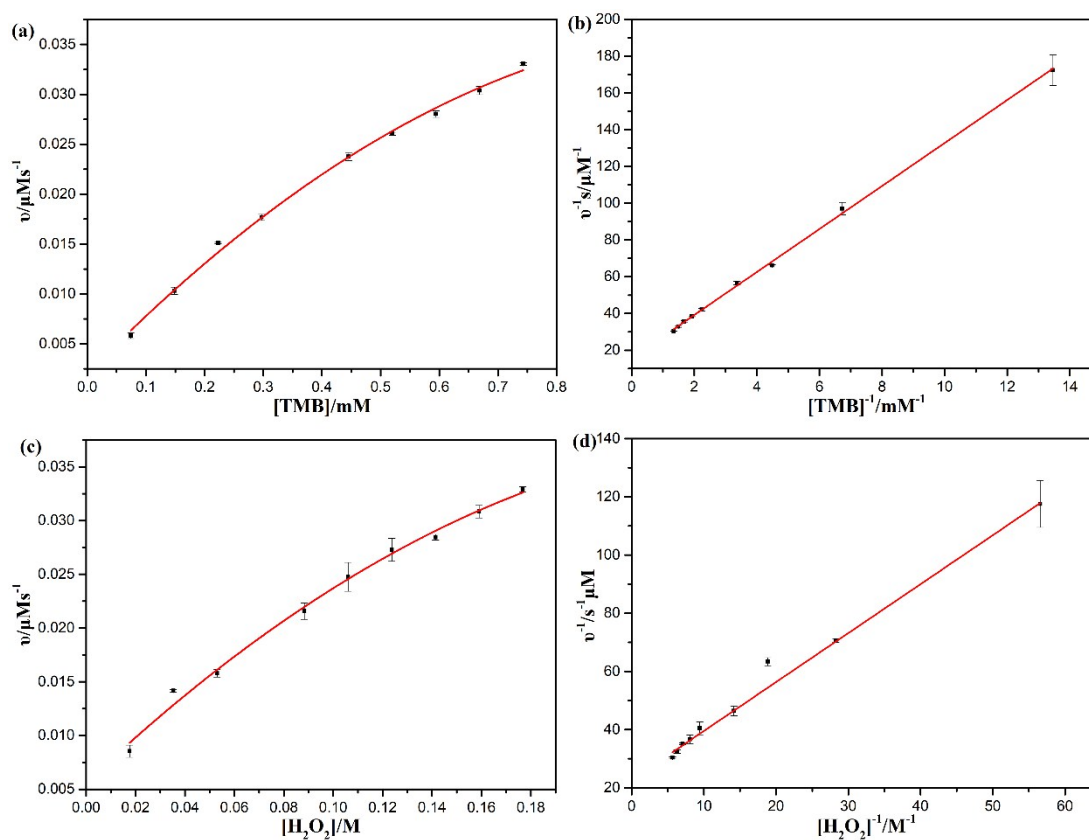

**Figure S12.** The steady-state kinetic assay and catalytic mechanism of citrate-capped Cu NPs, the initial reaction velocities were measured through the oxidation of TMB in the presence of  $\text{H}_2\text{O}_2$  at  $25^\circ\text{C}$ ,  $500\ \mu\text{l}\ \text{Hg}^{2+}$  ( $10\ \mu\text{M}$ ), pH 4.0, using  $100\ \mu\text{l}$  Cu NPs: (a) The  $\text{H}_2\text{O}_2$  concentration was fixed at  $0.177\ \text{M}$  and the TMB concentration was varied. (c) The TMB concentration was fixed at  $0.743\ \text{mM}$  and the  $\text{H}_2\text{O}_2$  concentration was varied. (b) and (d) were double reciprocal plots of (a) and (c), respectively.

**Table S1.** Comparisons of the kinetic data of the citrate-capped Cu NPs before and after the addition of  $\text{Hg}^{2+}$ .

|                           | Substrate              | $K_m$ (mM) | $V_{\max}$ ( $10^{-8}\text{Ms}^{-1}$ ) |
|---------------------------|------------------------|------------|----------------------------------------|
| Cu NPs                    | TMB                    | 1.629      | 4.978                                  |
|                           | $\text{H}_2\text{O}_2$ | 83.691     | 2.469                                  |
| Cu NPs + $\text{Hg}^{2+}$ | TMB                    | 0.742      | 6.344                                  |
|                           | $\text{H}_2\text{O}_2$ | 73.933     | 4.397                                  |

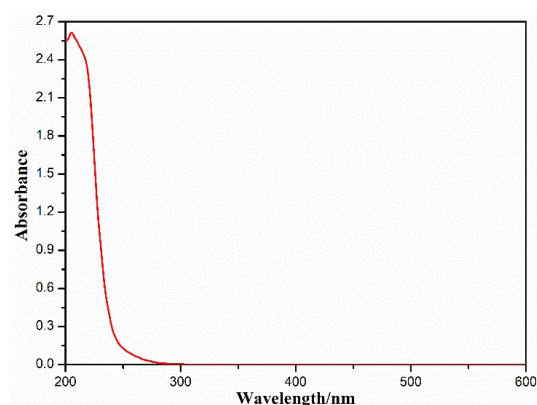

**Figure S13.** UV-Vis absorption spectra of  $\text{CuCl}_2$  solution.

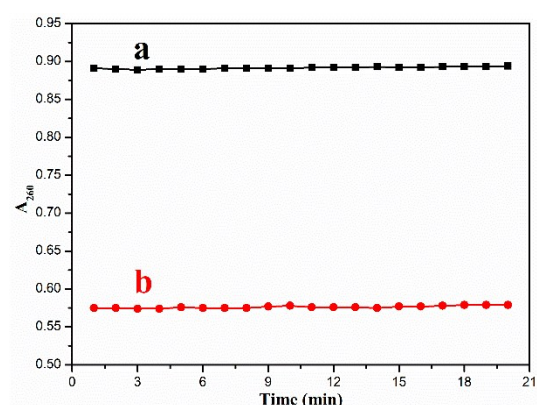

**Figure S14.** the absorbance values at 260 nm changes over time. (a) 1ml citrate-capped Cu NPs + 1ml  $\text{H}_2\text{O}$  (b) 1ml citrate-capped Cu NPs + 1ml  $\text{Hg}^{2+}$  ( $3 \times 10^{-6}$  M).  $A_{260}$  represent the absorbance at 260 nm.

**Table S2.** Determination of  $\text{Hg}^{2+}$  in real samples based on the peroxidase-like activity of citrate-capped Cu NPs

| Spiked ( $\mu\text{M}$ ) | Detected ( $\mu\text{M}$ ) | Recovery (%) | RSD (%) | ICP ( $\mu\text{M}$ ) |
|--------------------------|----------------------------|--------------|---------|-----------------------|
| 0.5                      | 0.53                       | 106.53       | 1.64    | 0.48                  |
| 1                        | 1.16                       | 117.16       | 2.31    | 1.03                  |
| 3                        | 3.22                       | 107.33       | 2.20    | 3.20                  |

**Table S3.** Determination of  $\text{Hg}^{2+}$  in real samples based on the characteristic absorption peak of citrate-capped Cu NPs

| Spiked ( $\mu\text{M}$ ) | Detected ( $\mu\text{M}$ ) | Recovery (%) | RSD (%) | ICP ( $\mu\text{M}$ ) |
|--------------------------|----------------------------|--------------|---------|-----------------------|
| 0.5                      | 0.49                       | 97.98        | 0.65    | 0.47                  |
| 1                        | 0.81                       | 81.07        | 0.84    | 0.93                  |
| 3                        | 2.76                       | 92.00        | 1.47    | 2.89                  |

**Table S4.** Compared of the advantages of two colorimetric methods that proposed in this study.

| colorimetric methods                                    | Advantage                                                                                                                                                                                 |
|---------------------------------------------------------|-------------------------------------------------------------------------------------------------------------------------------------------------------------------------------------------|
| Peroxidase-like activity of citrate-capped Cu NPs       | high selectivity and sensitivity<br>UV-vis is not strictly necessary, we can prepare test paper for $\text{Hg}^{2+}$ detection in the future. (Similar to detecting glucose) <sup>1</sup> |
| characteristic absorption peak of citrate-capped Cu NPs | high selectivity and sensitivity<br>Don't need TMB- $\text{H}_2\text{O}_2$ Chromogenic solution. More convenient<br>The absorbance value at 260nm is time-independent (Fig.S13)           |

**Table S5.** Comparison of the different analytical methods for Hg<sup>2+</sup> sensing

| Detection system                                    | method       | Linear range/LOD                     | References |
|-----------------------------------------------------|--------------|--------------------------------------|------------|
| RB-Fe <sub>3</sub> O <sub>4</sub> @SiO <sub>2</sub> | Fluorescence | 0-70 $\mu$ M / 2.13 $\mu$ M          | 2          |
| BSA-Au NCs                                          | Fluorescence | 0.001-0.020 $\mu$ M / 0.0005 $\mu$ M | 3          |
| C-DOTs                                              | Fluorescence | 0-3 $\mu$ M / 0.0042 $\mu$ M         | 4          |
| N-CDs                                               | Fluorescence | 0-25 $\mu$ M / 0.23 $\mu$ M          | 5          |
| DNA-Ag/Pt NCs                                       | Colorimetry  | 0.01-0.20 $\mu$ M / 0.005 $\mu$ M    | 6          |
| BSA-Au NCs                                          | Colorimetry  | 0.01-10 $\mu$ M / 0.003 $\mu$ M      | 7          |
| Gold NPs                                            | Colorimetry  | 0.5-50 $\mu$ M / 0.0185 $\mu$ M      | 8          |
| BSA-Pt NCs                                          | Colorimetry  | 0-0.12 $\mu$ M / 0.0072 $\mu$ M      | 9          |
| MoS <sub>2</sub> nanosheets                         | Colorimetry  | 2-200 $\mu$ M / 0.5 $\mu$ M          | 10         |
| L-cysteine-Cu Nps                                   | Colorimetry  | 0.5-3.5 $\mu$ M / 0.043 $\mu$ M      | 11         |
| N-lauryltyramine-capped Cu NPs                      | Colorimetry  | 0-25 $\mu$ M / 0.13 $\mu$ M          | 12         |
| Citrate- capped Cu NPs                              | Colorimetry  | 0.050-10.000 $\mu$ M / 0.185 $\mu$ M | This work  |
|                                                     | Colorimetry  | 0.100-6.000 $\mu$ M / 0.052 $\mu$ M  | This work  |

## References

1. Y. Luo, R. Shen, T. Li, C. Xiong, G. Li and L. Ling, *Talanta*, 2019, **196**, 493-497.
2. Z. Sun, G. Dan, H. Li, Z. Li, Y. Bo and S. Yan, *RSC Adv.*, 2015, **5**, 11000-11008.
3. J. Xie, Y. Zheng and J. Y. Ying, *Chem. Commun.*, 2010, **46**, 961-963.
4. L. Zhou, Y. Lin, Z. Huang, J. Ren and X. Qu, *Chem. Commun.*, 2012, **48**, 1147-1149.
5. R. Zhang and W. Chen, *Biosens. Bioelectron.*, 2014, **55**, 83-90.
6. L.-L. Wu, L.-Y. Wang, Z.-J. Xie, F. Xue and C.-F. Peng, *RSC Adv.*, 2016, **6**, 75384-75389.
7. R. Zhu, Y. Zhou, X.-L. Wang, L.-P. Liang, Y.-J. Long, Q.-L. Wang, H.-J. Zhang, X.-X. Huang and H.-Z. Zheng, *Talanta*, 2013, **117**, 127-132.
8. M. Guo, J. He, S. Ma, X. Sun and M. Zheng, *Nano*, 2017, **12**, 132-142.
9. Z. Dan, C. Chen, L. Lu, Y. Fan and X. Yang, *Sens. Actuator B-Chem.*, 2015, **215**, 437-444.
10. Y. Lu, J. Yu, W. Ye, X. Yao, P. Zhou, H. Zhang, S. Zhao and L. Jia, *Microchim. Acta*, 2016, **183**, 2481-2489.
11. R. A. Soomro, A. Nafady, Sirajuddin, N. Memon, T. H. Sherazi and N. H. Kalwar, *Talanta*, 2014, **130**, 415-422.
12. S. Megarajan, M. Vidhyalakshmi, K. B. A. Ahmed, V. Murali, B. R. S. Niranjani, N. Saisubramanian and V. Anbazhagan, *RSC Adv.*, 2016, **6**, 87513-87522.
